# Supplementary material for: Influence of Hypoxic Preservation Temperature on Endothelial Cells and Kidney Integrity
Source: Hindawi journal article supplement (doi:10.1155/2019/8572138), 2019-06-04
Supplement: f1 [file 8572138.f1.pdf]

## Supplementary Materials

Figure S1: Percentage of *in vitro* injuries induced by various tested preservation temperatures on endothelial cells

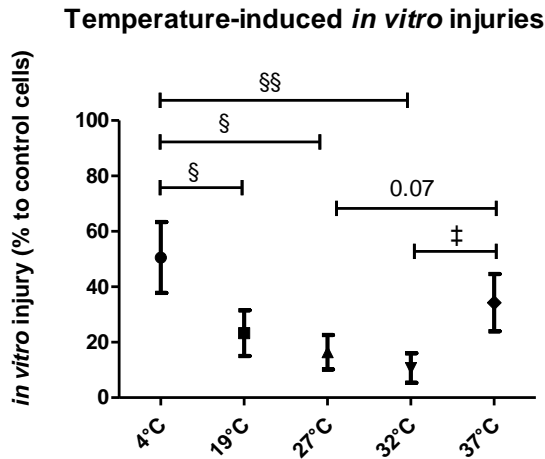

*Figure S1: Percentage of *in vitro* injuries induced by various tested preservation temperatures on endothelial cells. Scores were obtained by combination of *in vitro* evaluation results (LDH release, mitochondrial complex II activity, ATP measurement, ICAM-1 mRNA, MCP-1 mRNA, TLR4 mRNA and Leukocyte adhesion quantifications). Results are expressed % versus control cells (mean  $\pm$  SEM). Significant statistical data ( $p < 0.05$ ) were calculated using nonparametric Kruskal Wallis test + multiple comparison evaluation by Dunn's post test (§  $p < 0.05$  to Control cells, \* $p < 0.05$  versus 4°C, †  $p < 0.05$  versus 19°C, £  $p < 0.05$  versus 27°C, ‡  $p < 0.05$  versus 37°C).*

**Table S1: Primers used for real-time RT-PCR in porcine blood leukocytes and renal cortex tissue.**

| Target      | Primer Sequence                                                                                 |
|-------------|-------------------------------------------------------------------------------------------------|
| L19 (RPL19) | Forward primer : 5'-AATCGCCAACGCCAACTC-3'<br>Reverse primer : 5'-CAGCCCATCTTTGATCAGCTT-3'       |
| ICAM-1      | Forward primer : 5'-GGCTGTGCACTGCAACAAGA-3'<br>Reverse primer : 5'-TGTGGCAATGCCAAATCCT-3'       |
| MCP-1       | Forward primer : 5'-TCTCCAGTCACCTGCTGCTAT-3'<br>Reverse primer : 5'-TGCTTCTTTAGGACACTTGCTG-3'   |
| TLR4        | Forward primer : 5'-GCTTTTTGTGGGCTGCAAA-3'<br>Reverse primer : 5'-GGAGTAGATAACAAAGGCGTCATAGG-3' |

*Abbreviations:* L19 ribosomal protein gene (RPL19), Intercellular Adhesion Molecule-1 (ICAM-1), monocyte chemoattractant protein 1 (MCP-1 also call CCL2), Toll Like Receptor-4 (TLR4)
